# Supplementary material for: A Threshold of Objectively-Assessed Daily Sedentary Time for All-Cause Mortality in Older Adults: A Meta-Regression of Prospective Cohort Studies
Source: PubMed Central journal article supplement (PMC6517908; doi:10.3390/jcm8040564), 2019-04-25
Supplement: jcm-08-00564-s001.pdf [file jcm-08-00564-s001.pdf]

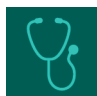

**Table S1.** Quality assessment of systematic reviews by Kmet, Lee and Cook rating.

| Author<br>(Year)      | Assessment items |     |     |     |     |     |     |     |     |     |     |         |     |        | Overall<br>rating |
|-----------------------|------------------|-----|-----|-----|-----|-----|-----|-----|-----|-----|-----|---------|-----|--------|-------------------|
|                       | 1                | 2   | 3   | 4   | 5   | 6   | 7   | 8   | 9   | 10  | 11  | 12      | 13  | 14     |                   |
| Koster et al., 2012   | Yes              | Yes | Yes | Yes | N/A | N/A | N/A | Yes | Yes | Yes | Yes | Yes     | Yes | Yes    | 1.0               |
| Lee, 2016             | Yes              | Yes | Yes | Yes | N/A | N/A | N/A | Yes | Yes | Yes | Yes | Yes     | Yes | Yes    | 1.0               |
| Diaz et al., 2017     | Yes              | Yes | Yes | Yes | N/A | N/A | N/A | Yes | Yes | Yes | Yes | Yes     | Yes | Yes    | 1.0               |
| Dohrn et al., 2017    | Yes              | Yes | Yes | Yes | N/A | N/A | N/A | Yes | Yes | Yes | Yes | Yes     | Yes | Yes    | 1.0               |
| Koolhaas et al., 2017 | Yes              | Yes | Yes | Yes | N/A | N/A | N/A | Yes | Yes | Yes | Yes | Partial | Yes | Yes    | 0.95              |
| Lee et al, 2018       | Yes              | Yes | Yes | Yes | N/A | N/A | N/A | Yes | Yes | Yes | Yes | Yes     | Yes | Yes    | 1.0               |
| Jefferis et al., 2018 | Yes              | Yes | Yes | Yes | N/A | N/A | N/A | Yes | Yes | Yes | Yes | Yes     | Yes | Yes    | 1.0               |
| Ensrud et al., 2014   | Yes              | Yes | Yes | Yes | N/A | N/A | N/A | Yes | Yes | Yes | Yes | Partial | Yes | Yes    | 0.95              |
| Fox et al., 2015      | Yes              | Yes | Yes | Yes | N/A | N/A | N/A | Yes | Yes | Yes | Yes | Yes     | Yes | Yes    | 1.0               |
| Schmid et al., 2015   | Yes              | Yes | Yes | Yes | N/A | N/A | N/A | Yes | Yes | Yes | Yes | Partial | Yes | Yes    | 0.95              |
| Klenk et al., 2016    | Yes              | Yes | Yes | Yes | N/A | N/A | N/A | Yes | Yes | Yes | Yes | Partial | Yes | Yes    | 0.95              |
|                       |                  |     |     |     |     |     |     |     |     |     |     |         |     | Mean = |                   |
|                       |                  |     |     |     |     |     |     |     |     |     |     |         |     | 0.98   |                   |

All items were scored as “Yes (2)”, “Partial (1)”, “No (0)”, “N/A=Not Applicable”. The quality checklist comprises the following items: 1. Question/objective sufficiently described; 2. Study design evident and appropriate; 3. Method of subject/comparison group selection of information/input variables described and appropriate; 4. Subject (and comparison group, if applicable) characteristics sufficiently described; 5. If interventional and random allocation was possible, was it described; 6. If interventional and blinding of investigators was possible, was it reported; 7. If interventional and blinding of subjects was possible, was it reported; 8. Outcome and (if applicable) exposure measure(s) well defined and robust to measurement /misclassification bias? Means of assessment reported; 9. Sample size appropriate; 10. Analytic methods described/justified and appropriate; 11. Some estimate of variance is reported for the main results; 12. Controlled for confounding; 13. Result reported in sufficient detail; 14. Conclusions supported by the results? a: Re-calculating quality score after further adjusting MVPA and accelerometer wear time.

**Table S2.** Goodness of fit for meta-regression analysis based on Model 1.

| Models                                  | P-values of regression coefficients |         |      |         | R <sup>2</sup> analog. |
|-----------------------------------------|-------------------------------------|---------|------|---------|------------------------|
|                                         | P1                                  | P-value | P2   | P-value |                        |
| <b>Linear</b>                           |                                     |         |      |         |                        |
|                                         | 1                                   | 0.15    |      |         | 0.34                   |
| <b>2nd-order fractional polynomials</b> |                                     |         |      |         |                        |
|                                         | -2                                  | 0.86    | -2   | 0.92    | 0.22                   |
|                                         | -2                                  | 0.81    | -1   | 0.93    | 0.22                   |
|                                         | -2                                  | 0.77    | -0.5 | 0.95    | 0.22                   |
|                                         | -2                                  | 0.73    | 0    | 0.97    | 0.22                   |
|                                         | -2                                  | 0.70    | 0.5  | 0.99    | 0.22                   |
|                                         | -2                                  | 0.66    | 1    | 0.99    | 0.22                   |
|                                         | -2                                  | 0.60    | 2    | 0.96    | 0.22                   |
|                                         | -1                                  | 0.79    | -1   | 0.87    | 0.22                   |
|                                         | -1                                  | 0.80    | -0.5 | 0.86    | 0.22                   |
|                                         | -1                                  | 0.77    | 0    | 0.88    | 0.22                   |
|                                         | -1                                  | 0.73    | 0.5  | 0.90    | 0.22                   |
|                                         | -1                                  | 0.70    | 1    | 0.93    | 0.22                   |
|                                         | -1                                  | 0.64    | 2    | 0.96    | 0.21                   |
|                                         | -0.5                                | 0.58    | -0.5 | 0.83    | 0.22                   |
|                                         | -0.5                                | 0.79    | 0    | 0.85    | 0.22                   |
|                                         | -0.5                                | 0.75    | 0.5  | 0.87    | 0.21                   |
|                                         | -0.5                                | 0.72    | 1    | 0.89    | 0.21                   |
|                                         | -0.5                                | 0.66    | 2    | 0.93    | 0.21                   |
|                                         | 0                                   | 0.77    | 0    | 0.81    | 0.21                   |
|                                         | 0                                   | 0.77    | 0.5  | 0.83    | 0.21                   |
|                                         | 0                                   | 0.74    | 1    | 0.85    | 0.21                   |
|                                         | 0                                   | 0.68    | 2    | 0.89    | 0.20                   |
|                                         | 0.5                                 | 0.77    | 0.5  | 0.80    | 0.21                   |
|                                         | 0.5                                 | 0.76    | 1    | 0.82    | 0.20                   |
|                                         | 0.5                                 | 0.70    | 2    | 0.85    | 0.20                   |
|                                         | 1                                   | 0.75    | 1    | 0.78    | 0.20                   |
| <b>Squared</b>                          | 1                                   | 0.72    | 2    | 0.82    | 0.20                   |
|                                         | 2                                   | 0.73    | 2    | 0.76    | 0.19                   |

**Table S3.** Goodness of fit for meta-regression analysis based on Model2.

| Models                                  | P-values of regression coefficients |         |      |         | R <sup>2</sup> analog. |
|-----------------------------------------|-------------------------------------|---------|------|---------|------------------------|
|                                         | P1                                  | P-value | P2   | P-value |                        |
| <b>Linear</b>                           |                                     |         |      |         |                        |
|                                         | 1                                   | 0.02    |      |         | 0.73                   |
| <b>2nd-order fractional polynomials</b> |                                     |         |      |         |                        |
|                                         | -2                                  | 0.89    | -2   | 0.99    | 0.66                   |
|                                         | -2                                  | 0.77    | -1   | 0.98    | 0.66                   |
|                                         | -2                                  | 0.68    | -0.5 | 0.99    | 0.66                   |
|                                         | -2                                  | 0.59    | 0    | 0.99    | 0.66                   |
|                                         | -2                                  | 0.49    | 0.5  | 0.99    | 0.66                   |
|                                         | -2                                  | 0.41    | 1    | 0.99    | 0.66                   |
|                                         | -2                                  | 0.28    | 2    | 0.97    | 0.65                   |
|                                         | -1                                  | 0.70    | -1   | 0.86    | 0.66                   |
|                                         | -1                                  | 0.71    | -0.5 | 0.82    | 0.66                   |
|                                         | -1                                  | 0.60    | 0    | 0.81    | 0.66                   |
|                                         | -1                                  | 0.50    | 0.5  | 0.79    | 0.66                   |
|                                         | -1                                  | 0.42    | 1    | 0.78    | 0.66                   |
|                                         | -1                                  | 0.28    | 2    | 0.76    | 0.66                   |
|                                         | -0.5                                | 0.29    | -0.5 | 0.69    | 0.66                   |
|                                         | -0.5                                | 0.59    | 0    | 0.69    | 0.66                   |
|                                         | -0.5                                | 0.49    | 0.5  | 0.68    | 0.66                   |
|                                         | -0.5                                | 0.41    | 1    | 0.67    | 0.66                   |
|                                         | -0.5                                | 0.27    | 2    | 0.65    | 0.67                   |
|                                         | 0                                   | 0.50    | 0    | 0.58    | 0.66                   |
|                                         | 0                                   | 0.48    | 0.5  | 0.57    | 0.67                   |
|                                         | 0                                   | 0.40    | 1    | 0.56    | 0.67                   |
|                                         | 0                                   | 0.27    | 2    | 0.55    | 0.68                   |
|                                         | 0.5                                 | 0.44    | 0.5  | 0.48    | 0.67                   |
|                                         | 0.5                                 | 0.39    | 1    | 0.47    | 0.67                   |
|                                         | 0.5                                 | 0.26    | 2    | 0.46    | 0.68                   |
|                                         | 1                                   | 0.35    | 1    | 0.39    | 0.68                   |
| <b>Squared</b>                          | 1                                   | 0.26    | 2    | 0.38    | 0.69                   |
|                                         | 2                                   | 0.22    | 2    | 0.25    | 0.70                   |
